# Supplementary material for: Activation of the Tumor Suppressor PP2A Emerges as a Potential Therapeutic Strategy for Treating Prostate Cancer
Source: PubMed Central journal article supplement (PMC4483628; doi:10.3390/md13063276), 2015-05-27
Supplement: marinedrugs-13-03276-s001.pdf [file marinedrugs-13-03276-s001.pdf]

## Supplementary Information

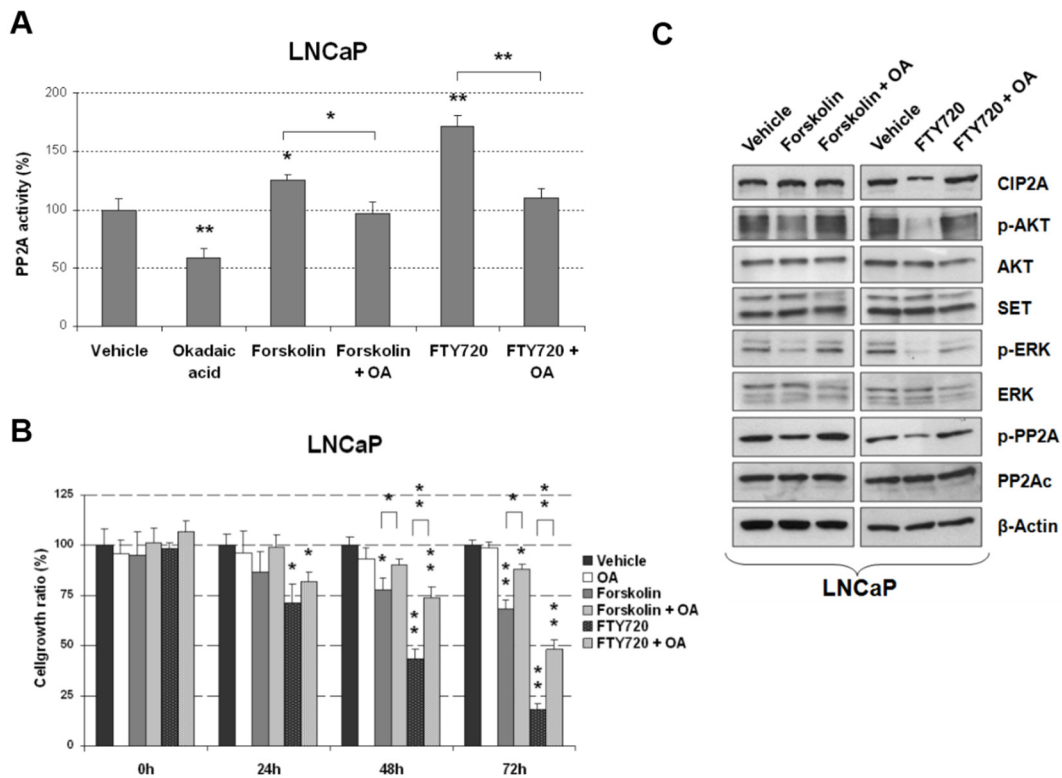

**Figure S1.** Forskolin and FTY720 impair PCa-cell proliferation via PP2A activation. (A) PP2A assays in LNCaP cells treated with forskolin or FTY720, and pretreated or not with OA for 2 h; (B) MTS assay showing cell viability in LNCaP cells treated with forskolin or FTY720, alone or in combination with OA; (C) Western blot analysis of PP2Ac, CIP2A, SET, AKT, and ERK1/2 after treatment with forskolin or FTY720 for 24 h in LNCaP cells; \*  $P < 0.05$ ; \*\*  $P < 0.01$ .

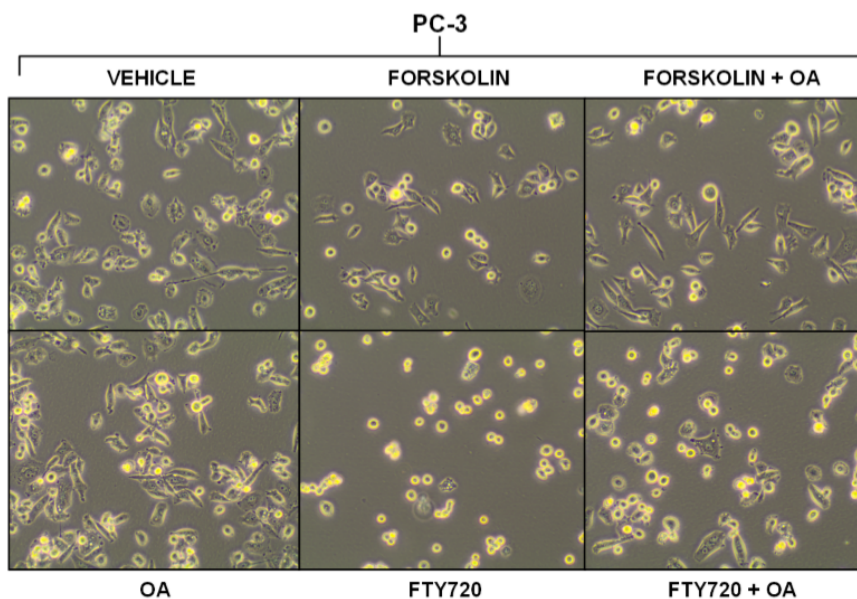

**Figure S2.** Optical microscope images showing PC-3 cells treated with forskolin or FTY720 for 72 h (magnification 400 $\times$ ).

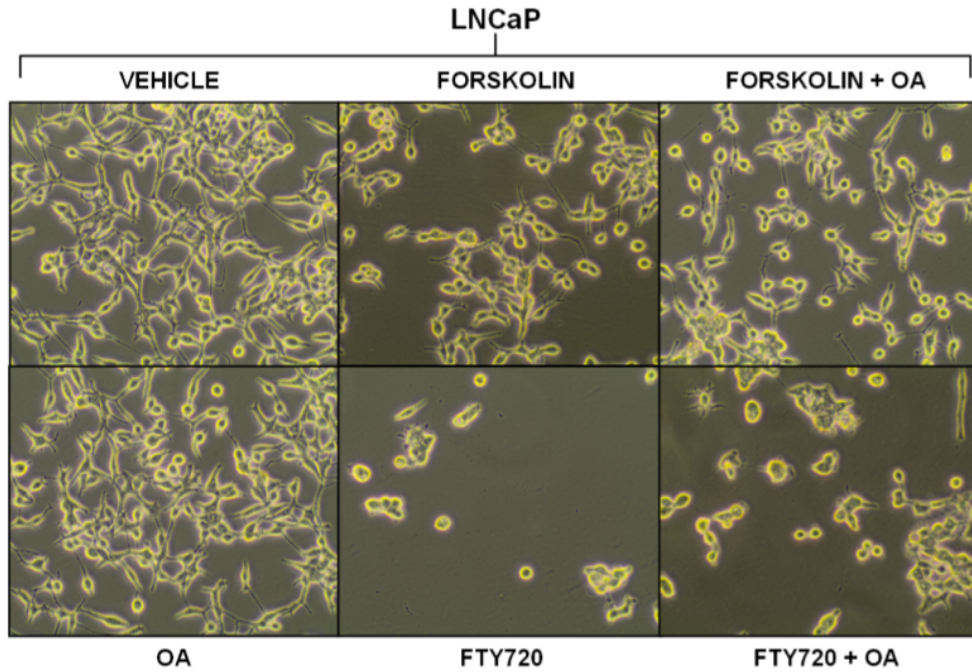

**Figure S3.** Optical microscope images showing LNCaP cells treated with forskolin or FTY720 for 72 h (magnification 400×).

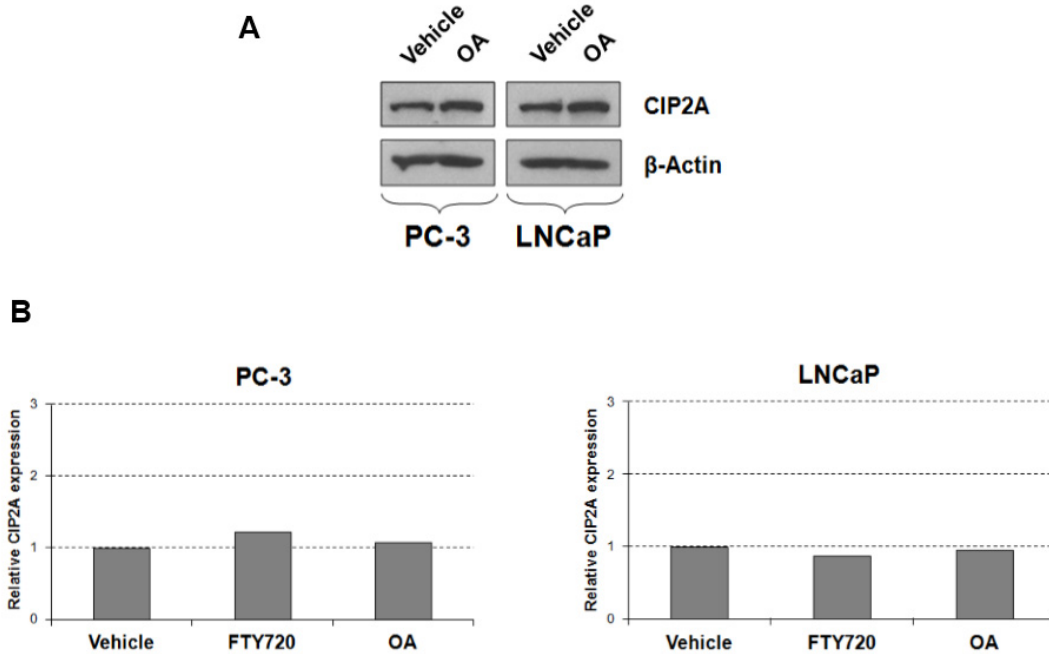

**Figure S4.** Regulation of CIP2A by FTY720 and OA. **(A)** Western blot analysis of CIP2A after OA treatment for 24 h; **(B)** Quantification of CIP2A mRNA by real-time PCR in PC-3 and LNCaP cells treated with FTY720 or OA.

**Table S1.** Clinical and molecular characteristics of the 24 patients with prostate cancer included in the study.

| Case | Age | Gleason | Metastases | Metastatic Site | RT  | CT                 | HT  | p-PP2A+ | CIP2A+ | SET+ |
|------|-----|---------|------------|-----------------|-----|--------------------|-----|---------|--------|------|
| P1   | 59  | 6 (3+3) | No         |                 | No  | No                 | No  | No      | Yes    | Yes  |
| P2   | 69  | 6 (3+3) | No         |                 | No  | No                 | No  | No      | No     | ND   |
| P3   | 69  | 6 (3+3) | No         |                 | No  | No                 | No  | No      | No     | Yes  |
| P4   | 72  | 7 (3+4) | No         |                 | Yes | No                 | No  | Yes     | ND     | ND   |
| P5   | 67  | 6 (3+3) | No         |                 | No  | No                 | No  | Yes     | No     | ND   |
| P6   | 65  | 6 (3+3) | No         |                 | No  | No                 | No  | Yes     | No     | ND   |
| P7   | 60  | 6 (3+3) | No         |                 | No  | No                 | No  | No      | No     | Yes  |
| P8   | 60  | 6 (3+3) | No         |                 | Yes | No                 | No  | Yes     | Yes    | Yes  |
| P9   | 57  | 6 (3+3) | No         |                 | No  | No                 | No  | Yes     | Yes    | No   |
| P10  | 70  | 6 (3+3) | No         |                 | No  | No                 | No  | Yes     | Yes    | No   |
| P11  | 69  | 6 (3+3) | No         |                 | Yes | No                 | No  | No      | No     | No   |
| P12  | 71  | 6 (3+3) | No         |                 | No  | No                 | No  | No      | No     | ND   |
| P13  | 64  | 6 (3+3) | No         |                 | No  | No                 | No  | No      | Yes    | ND   |
| P14  | 65  | 6 (3+3) | No         |                 | No  | No                 | No  | No      | No     | ND   |
| P15  | 65  | 6 (3+3) | No         |                 | No  | No                 | No  | No      | Yes    | ND   |
| P16  | 68  | 7 (3+4) | No         |                 | No  | No                 | No  | No      | Yes    | ND   |
| P17  | 73  | 6 (3+3) | No         |                 | No  | No                 | No  | No      | No     | ND   |
| P18  | 63  | 6 (3+3) | No         |                 | No  | No                 | No  | No      | ND     | ND   |
| P19  | 63  | 7 (3+4) | Yes        | Multiple sites  | No  | No                 | Yes | Yes     | Yes    | Yes  |
| P20  | 80  | 9 (4+5) | Yes        | Lymph nodes     | No  | No                 | Yes | Yes     | Yes    | Yes  |
| P21  | 78  | 7 (3+4) | Yes        | Gall bladder    | Yes | No                 | Yes | Yes     | ND     | ND   |
| P22  | 71  | 8 (3+5) | Yes        | Lymph nodes     | Yes | No                 | Yes | Yes     | Yes    | ND   |
| P23  | 68  | 8 (3+5) | Yes        | Bone            | No  | Yes<br>(docetaxel) | Yes | Yes     | Yes    | ND   |
| P24  | 66  | 7 (3+4) | Yes        | Bone            | No  | No                 | No  | Yes     | Yes    | Yes  |

RT: radiotherapy; CT: chemotherapy; HT: hormone therapy; ND: no data.

**Table S2.** Association of CIP2A, p-PP2A and SET with the presence of metastatic disease in 24 prostate cancer patients.

|                                  | No. Cases | NMD (%)   | MD (%)   | P            |
|----------------------------------|-----------|-----------|----------|--------------|
| <b>CIP2A overexpression</b>      | <b>21</b> | <b>16</b> | <b>5</b> | <b>0.027</b> |
| No                               | 9         | 9 (100)   | 0 (0)    |              |
| Yes                              | 12        | 7 (58.3)  | 5 (41.7) |              |
| <b>PP2A hyperphosphorylation</b> | <b>24</b> | <b>18</b> | <b>6</b> | <b>0.005</b> |
| No                               | 12        | 12 (100)  | 0 (0)    |              |
| Yes                              | 12        | 6 (50)    | 6 (50)   |              |
| <b>SET overexpression</b>        | <b>10</b> | <b>7</b>  | <b>3</b> | <b>0.175</b> |
| No                               | 3         | 3 (100)   | 0 (0)    |              |
| Yes                              | 7         | 4 (57.1)  | 3 (42.9) |              |

NMD: non-metastatic disease; MD: metastatic disease.
